# Supplementary material for: Monitoring Protein Dynamics in Protein O-Mannosyltransferase Mutants In Vivo by Tandem Fluorescent Protein Timers
Source: MDPI journal article supplement (doi:10.3390/molecules23102622), 2018-10-12
Supplement: s1 [file s1]

## Supplemental Figure S1

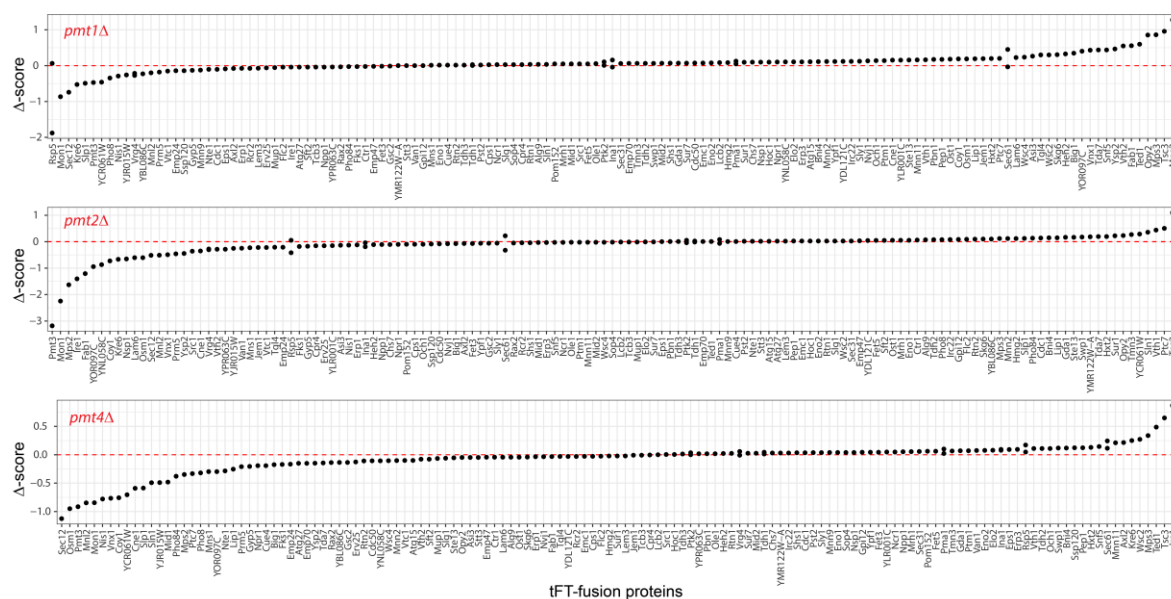

**Figure S1.** Dynamics of tFT-fusion proteins in different *pmtΔ* strains. Differences in fluorescence intensities of mCherry and sfGFP are compared between mutant and wildtype strain ( $\Delta$ -score) and summarized in an ordered dot plot. A negative  $\Delta$ -score indicates a prolonged lifetime of the tFT-fusion protein in the mutant compared to the wildtype, while a positive  $\Delta$ -score indicates destabilizing effects and a higher turnover of protein. Measurements were performed by high throughput fluorescence microscopy of triplicates. Proteins with multiple results were spotted on multiple plates for internal control. Results are shown as a measure of variance between experiments.
